# Supplementary material
Source: Elsevier journal article supplement (https://comptes-rendus.academie-sciences.fr/chimie/article/10.1016/j.crci.2010.03.034/file/attach/mmc1.pdf)
Supplement: mmc1 [file mmc1.pdf]

## Supporting Information

### Curvature of the Lanthanide Contraction: An Explanation

Kenneth N. Raymond\*, Daniel L. Wellman, Carmelo Sgarlata, P. Aru Hill,

*Department of Chemistry, University of California, Berkeley and Chemical Science Division,*

*Lawrence Berkeley National Laboratory, Berkeley, CA, 94720-1460*

\* Corresponding author.

*E-mail address:* [raymond@socrates.berkeley.edu](mailto:raymond@socrates.berkeley.edu)

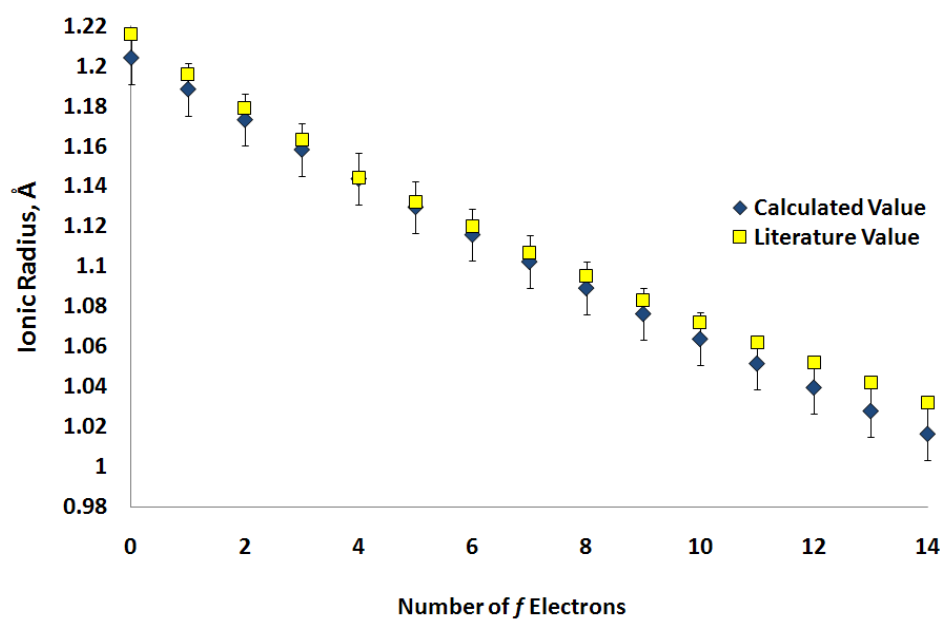

**Fig. S1.** Comparison between the ionic radii of the lanthanide series calculated by making use of the refined values for  $a$  and  $b$  of Eq. (1) and those reported in the literature [1].

**Table S1.** Refined values for the parameters  $a$ ,  $b$ , and  $r_{(L)}$ 

| Parameter                                             | Refined value <sup>a</sup> |
|-------------------------------------------------------|----------------------------|
| $a$                                                   | 0.865(3) Å <sup>-1</sup>   |
| $b$                                                   | 0.0114(4) Å <sup>-1</sup>  |
| $r_{(L)}$ ; L = Te <sub>(axial)</sub>                 | 2.041(6) Å                 |
| $r_{(L)}$ ; L = H <sub>2</sub> O <sub>(capping)</sub> | 1.512(5) Å                 |

<sup>a</sup>  $\sigma$  in parentheses**Table S2.** Correlation coefficient matrix of the refined parameters  $a$ ,  $b$ ,  $r_{(L)}$ .

|                                                       | $a$    | $b$     | $r_{(L)}$ ; L = Te <sub>(axial)</sub> | $r_{(L)}$ ; L = H <sub>2</sub> O <sub>(capping)</sub> |
|-------------------------------------------------------|--------|---------|---------------------------------------|-------------------------------------------------------|
| $a$                                                   | 1.0000 | -0.7271 | 0.2233                                | 0.4488                                                |
| $b$                                                   |        | 1.0000  | 0.1052                                | -0.0867                                               |
| $r_{(L)}$ ; L = Te <sub>(axial)</sub>                 |        |         | 1.0000                                | 0.2362                                                |
| $r_{(L)}$ ; L = H <sub>2</sub> O <sub>(capping)</sub> |        |         |                                       | 1.0000                                                |

## References

- [1] R. Shannon, Acta Cryst. A32 (1976) 751.
